# Supplementary material for: Insights into the epidemiological analysis of subarachnoid hemorrhage burden and trends in middle-aged and elderly populations: a global perspective from the Global Burden of Disease Study 2021
Source: Front Neurol. 2025 Aug 18;16:1518319. doi: 10.3389/fneur.2025.1518319 (PMC12400870; doi:10.3389/fneur.2025.1518319)
Supplement: SUPPLEMENTARY TABLE S11 — Frontier analysis and effective differences in the incidence of middle-aged and elderly subarachnoid hemorrhage by country or region. [file Table_11.XLSX]

## Sheet: Sheet1
Year	Incidence		Prevalence		Mortality		DALYs
	Slope index (95% CI)	Concentration index (95% CI)	Slope index (95% CI)	Concentration index (95% CI)	Slope index (95% CI)	Concentration index (95% CI)	Slope index (95% CI)	Concentration index (95% CI)
1990	4.615(1.076 to 8.154)	0.016(-0.014 to 0.045)	40.474(-2.41 to 83.357)	0.049(0.026 to 0.073)	1.841(-1.306 to 4.989)	-0.004(-0.068 to 0.06)	1.694(-87.228 to 90.617)	-0.017(-0.072 to 0.039)
1991	4.325(0.725 to 7.926)	0.01(-0.02 to 0.041)	38.013(-4.982 to 81.008)	0.049(0.024 to 0.073)	1.77(-1.39 to 4.93)	-0.012(-0.076 to 0.052)	-2.98(-91.387 to 85.427)	-0.024(-0.079 to 0.032)
1992	4.014(0.41 to 7.617)	0.01(-0.022 to 0.042)	36.163(-6.543 to 78.869)	0.049(0.024 to 0.074)	1.58(-1.574 to 4.734)	-0.01(-0.073 to 0.054)	-6.24(-93.541 to 81.061)	-0.022(-0.076 to 0.032)
1993	3.836(0.22 to 7.453)	0.003(-0.029 to 0.036)	36.956(-5.653 to 79.565)	0.055(0.03 to 0.08)	1.517(-1.682 to 4.717)	-0.027(-0.09 to 0.036)	-8.523(-96.981 to 79.935)	-0.034(-0.088 to 0.019)
1994	3.582(-0.033 to 7.197)	0.008(-0.025 to 0.04)	33.861(-8.422 to 76.144)	0.054(0.029 to 0.079)	1.194(-1.994 to 4.381)	-0.017(-0.078 to 0.045)	-15.436(-103.075 to 72.204)	-0.025(-0.077 to 0.027)
1995	3.264(-0.338 to 6.867)	0.01(-0.023 to 0.043)	31.839(-9.357 to 73.034)	0.052(0.026 to 0.077)	0.957(-2.202 to 4.116)	-0.009(-0.069 to 0.052)	-21.469(-108.166 to 65.229)	-0.019(-0.07 to 0.032)
1996	2.878(-0.702 to 6.458)	0.02(-0.013 to 0.052)	27.062(-13.749 to 67.873)	0.046(0.02 to 0.072)	0.707(-2.314 to 3.727)	0.015(-0.043 to 0.074)	-31.402(-115.394 to 52.59)	-0.002(-0.052 to 0.047)
1997	2.755(-0.82 to 6.33)	0.021(-0.011 to 0.052)	26.807(-13.541 to 67.155)	0.047(0.02 to 0.073)	0.783(-2.205 to 3.77)	0.015(-0.041 to 0.071)	-32.024(-114.476 to 50.429)	-0.004(-0.051 to 0.043)
1998	2.486(-1.072 to 6.044)	0.022(-0.008 to 0.051)	24.954(-15.085 to 64.993)	0.048(0.021 to 0.075)	0.745(-2.084 to 3.574)	0.018(-0.035 to 0.071)	-33.814(-112.62 to 44.991)	-0.002(-0.046 to 0.042)
1999	1.973(-1.549 to 5.496)	0.026(-0.002 to 0.054)	20.291(-19.78 to 60.361)	0.042(0.014 to 0.07)	0.946(-1.896 to 3.789)	0.047(-0.002 to 0.097)	-31.452(-109.994 to 47.09)	0.018(-0.023 to 0.06)
2000	1.912(-1.555 to 5.378)	0.029(0.002 to 0.056)	20.714(-18.884 to 60.312)	0.042(0.014 to 0.07)	1.401(-1.388 to 4.189)	0.062(0.016 to 0.107)	-22.847(-100.793 to 55.099)	0.028(-0.011 to 0.067)
2001	1.791(-1.62 to 5.202)	0.028(0.001 to 0.054)	20.116(-19.39 to 59.622)	0.043(0.014 to 0.072)	1.542(-1.175 to 4.26)	0.06(0.018 to 0.102)	-18.835(-95.329 to 57.658)	0.024(-0.011 to 0.06)
2002	1.674(-1.701 to 5.05)	0.028(0.002 to 0.054)	17.506(-21.648 to 56.659)	0.043(0.014 to 0.072)	1.54(-1.166 to 4.246)	0.057(0.019 to 0.094)	-22.497(-99.616 to 54.623)	0.02(-0.013 to 0.053)
2003	1.594(-1.722 to 4.91)	0.028(0.002 to 0.054)	16.01(-22.611 to 54.632)	0.043(0.013 to 0.073)	1.376(-1.302 to 4.055)	0.05(0.015 to 0.084)	-26.959(-103.476 to 49.558)	0.012(-0.019 to 0.043)
2004	1.53(-1.76 to 4.821)	0.028(0.002 to 0.053)	15.754(-22.753 to 54.26)	0.044(0.014 to 0.075)	0.999(-1.712 to 3.71)	0.042(0.008 to 0.075)	-35.676(-109.686 to 38.334)	0.004(-0.026 to 0.035)
2005	1.477(-1.798 to 4.753)	0.029(0.003 to 0.055)	13.503(-24.59 to 51.596)	0.042(0.011 to 0.072)	0.636(-1.992 to 3.263)	0.041(0.008 to 0.074)	-44.517(-118.208 to 29.174)	0.003(-0.028 to 0.033)
2006	1.483(-1.742 to 4.709)	0.029(0.004 to 0.055)	13.34(-24.43 to 51.109)	0.042(0.011 to 0.074)	0.516(-2.1 to 3.131)	0.032(0 to 0.064)	-48.587(-119.663 to 22.488)	-0.006(-0.037 to 0.024)
2007	1.527(-1.627 to 4.681)	0.029(0.003 to 0.055)	12.938(-24.737 to 50.613)	0.042(0.01 to 0.074)	0.188(-2.433 to 2.81)	0.026(-0.005 to 0.057)	-54.814(-125.303 to 15.675)	-0.013(-0.043 to 0.017)
2008	1.174(-1.995 to 4.344)	0.027(0.001 to 0.053)	8.417(-29.229 to 46.063)	0.041(0.009 to 0.074)	-0.149(-2.73 to 2.431)	0.023(-0.007 to 0.054)	-61.715(-131.289 to 7.858)	-0.016(-0.046 to 0.013)
2009	0.94(-2.258 to 4.138)	0.023(-0.003 to 0.049)	6.418(-30.903 to 43.74)	0.038(0.004 to 0.071)	-0.365(-2.944 to 2.214)	0.019(-0.011 to 0.049)	-70.138(-142.04 to 1.764)	-0.022(-0.051 to 0.007)
2010	0.931(-2.266 to 4.128)	0.023(-0.003 to 0.049)	4.717(-32.732 to 42.166)	0.036(0.002 to 0.07)	-0.077(-2.684 to 2.529)	0.023(-0.007 to 0.052)	-67.192(-137.913 to 3.529)	-0.02(-0.049 to 0.009)
2011	0.963(-2.232 to 4.158)	0.025(-0.002 to 0.051)	3.744(-33.65 to 41.137)	0.036(0.001 to 0.07)	0.074(-2.475 to 2.623)	0.026(-0.003 to 0.055)	-64.504(-133.471 to 4.463)	-0.019(-0.048 to 0.009)
2012	0.984(-2.195 to 4.164)	0.025(-0.001 to 0.051)	3.954(-33.487 to 41.395)	0.036(0.001 to 0.07)	0.082(-2.429 to 2.593)	0.026(-0.003 to 0.055)	-65.598(-133.529 to 2.333)	-0.02(-0.049 to 0.008)
2013	0.918(-2.249 to 4.084)	0.025(-0.001 to 0.051)	3.08(-34.282 to 40.442)	0.036(0.001 to 0.071)	-0.034(-2.5 to 2.431)	0.025(-0.003 to 0.054)	-70.258(-136.751 to -3.764)	-0.022(-0.05 to 0.006)
2014	0.932(-2.211 to 4.075)	0.026(0 to 0.052)	3.886(-33.448 to 41.219)	0.036(0.001 to 0.071)	-0.143(-2.573 to 2.286)	0.028(0 to 0.056)	-73.091(-137.991 to -8.192)	-0.02(-0.048 to 0.007)
2015	0.916(-2.204 to 4.036)	0.027(0.001 to 0.053)	4.88(-32.387 to 42.148)	0.037(0.001 to 0.072)	-0.134(-2.567 to 2.3)	0.029(0.001 to 0.057)	-73.126(-137.832 to -8.42)	-0.021(-0.048 to 0.006)
2016	1.071(-2.043 to 4.184)	0.029(0.003 to 0.055)	5.035(-32.248 to 42.319)	0.037(0.002 to 0.072)	-0.186(-2.625 to 2.253)	0.032(0.004 to 0.059)	-75.168(-138.78 to -11.556)	-0.019(-0.047 to 0.008)
2017	1.16(-1.971 to 4.291)	0.03(0.004 to 0.056)	4.967(-32.772 to 42.706)	0.037(0.002 to 0.072)	-0.114(-2.501 to 2.273)	0.031(0.003 to 0.059)	-74.747(-138.045 to -11.449)	-0.02(-0.048 to 0.007)
2018	1.301(-1.843 to 4.446)	0.032(0.006 to 0.058)	5.863(-32.116 to 43.842)	0.037(0.002 to 0.073)	-0.046(-2.439 to 2.348)	0.032(0.004 to 0.06)	-73(-136.022 to -9.977)	-0.02(-0.048 to 0.007)
2019	1.406(-1.745 to 4.556)	0.034(0.007 to 0.06)	7.226(-31.011 to 45.463)	0.038(0.003 to 0.073)	-0.109(-2.472 to 2.254)	0.033(0.005 to 0.061)	-74.433(-137.053 to -11.814)	-0.019(-0.047 to 0.008)
2020	1.353(-1.668 to 4.374)	0.038(0.013 to 0.063)	7.769(-31.064 to 46.602)	0.038(0.003 to 0.073)	-0.442(-2.853 to 1.97)	0.033(0.005 to 0.061)	-83.605(-146.671 to -20.54)	-0.021(-0.048 to 0.007)
2021	1.095(-1.921 to 4.112)	0.034(0.009 to 0.059)	3.907(-34.892 to 42.705)	0.04(0.005 to 0.075)	-0.555(-2.942 to 1.832)	0.038(0.009 to 0.066)	-88.866(-151.094 to -26.638)	-0.018(-0.046 to 0.01)
